# Supplementary material
Source: publisher site journal article supplement (http://www.degruyter.com/publication/journal_key/ICOM/downloadAsset/ICOM_ICOM_Information_for_Authors.pdf)
Supplement: Supplementary file 1 [file ICOM_ICOM_Information_for_Authors.pdf]

## Information for Authors „i-com – Journal of Interactive Media“

All contributions to the "i-com - Journal of Interactive Media" undergo a (single-blind) peer review process prior to publication. To manage the peer review process, the publisher uses the online system "Scholar One Manuscripts".

All manuscripts are initially reviewed by the Editor-in-Chief to assess the level of scientific writing, scientific innovation and integrity. Manuscripts that proceed to the peer review stage are reviewed by at least two independent reviewers selected by the Editor-in-Chief.

Please submit your paper in English for peer review through the system at <https://mc.manuscriptcentral.com/icom>. The system will ask you for the required information and finally ask you to upload the appropriate files.

You need to upload

- Main Document (Word or PDF) – the main text with bibliography – you do not need to anonymize the manuscript

You should upload

- Authors Biography – portrait image and short biographies (about 300-400 characters without whitespace)
- Separate files for figures / images (including portrait images in author biographies)
- When preparing the manuscript in LaTeX a ZIP file of the LaTeX single files

Submission information can be found on the Journal home page at <https://www.degruyter.com/view/journals/icom/icom-overview.xml>. You do not need to use a template for manuscript preparation in LaTeX or Word – however, you may use the templates provided on the journal homepage.

One of the core aims of the journals is to publish research on important issues addressing how humans interact with computers and related media, and how these impact in our daily lives.

*i-com* publishes a regular programme of special issues that are devoted to these important themes. Ideas for special issues are proposed by the journal's editorial board, and all proposals are assessed for quality and relevance by the Editor-in-Chief.

The journal has established a rigorous process to ensure that any special issues follow the same high-quality standards and peer review processes as regular issues. Each special issue has dedicated Guest Editor(s), who is/are responsible for the peer review of any manuscripts submitted to the special issue in the online submission system.

The Editor-in-Chief checks the initial manuscript and assigns it to the appropriate Guest Editor. The Guest Editor invites reviewers and makes revision and final decisions. The Editor-in-Chief has oversight of the entire process within the online submission system.

### Figures in the article

Please save each figure in a separate image file, ideally as -.eps or -.tiff file. The minimum resolution of tone value illustrations (e.g. photographs) should be 300 dpi, whereas for screened line drawings (e.g. graphics) it should be 1,200 dpi.

### Reference Style

All references should be mentioned in the text or captions. They should be typed in brackets, e.g., [41], in sequence.

References appear at the end of the paper in numerical order.

Please see the following examples for the ACS numbered reference style below.

### ACS (Numbered) Reference Style

| In-text citation                            |                                                                                                                                                                                                                                                                                                     |
|---------------------------------------------|-----------------------------------------------------------------------------------------------------------------------------------------------------------------------------------------------------------------------------------------------------------------------------------------------------|
| Single reference                            | [1]                                                                                                                                                                                                                                                                                                 |
| Series of references                        | [2, 8, 25]                                                                                                                                                                                                                                                                                          |
| Range of references                         | [5–12]                                                                                                                                                                                                                                                                                              |
| Citation order                              | Sequential                                                                                                                                                                                                                                                                                          |
| Issue number                                | Not allowed                                                                                                                                                                                                                                                                                         |
| Reference list                              |                                                                                                                                                                                                                                                                                                     |
| Reference type                              | Example                                                                                                                                                                                                                                                                                             |
| Reference list label                        | Numbered without square bracket                                                                                                                                                                                                                                                                     |
| Author initials                             | Abbreviated                                                                                                                                                                                                                                                                                         |
| 1. Journal                                  | 1. Jeannot M. A., Cantwell F. F. Solvent microextraction into a single drop. <i>Anal. Chem.</i> 1996, 68, 2236–2240.<br>[Article title allowed, not mandatory.]                                                                                                                                     |
| 2. Journal with supplement                  | 2. Yuan M., Liu H. The economic consequences of fair value accounting. <i>Account. Econ. Law</i> 2011, 1(Suppl. 2), 1–42.                                                                                                                                                                           |
| 3. Collaboration                            | 3. American Society of Brewing Chemists. <i>Methods of Analysis</i> , 8th ed.; Springer: London, 1992.                                                                                                                                                                                              |
| 4. No et al. usage (all authors are listed) | 4. Kaye K., Day R. D., Hair E. C., Moore K. A., Hadley A. M., Teixeira P. J., Helmschrott S., Massing N., Ackermann D., Yuan M. Parent marital quality and the parent-adolescent relationship: effects on sexual activity among adolescents and youth. <i>Marriage Fam. Rev.</i> 2009, 45, 270–288. |
| 5. Epub ahead of print                      | 5. Shah H. H., Stratz S., Hauser P. C. Electro-driven extraction across a polymer inclusion membrane in a flow-through cell. <i>J. Chromatogr. A</i> 2013, published ahead of print; doi: 10.1016/j.chroma.2013.01.062                                                                              |
| 6. Reference – in press                     | 6. Tang D., Jankowiak R., Small G. J., Tiede D. M. Deepoxy T-2 tetrol: a metabolite of TO <sub>2</sub> toxin found in cow urine. <i>Chem. Phys.</i> , in press.                                                                                                                                     |
| 7. Book/monograph                           | 7. Wertheimer A. I., Norris, J. <i>Chemometrics with R</i> ; Springer: London, 2011.                                                                                                                                                                                                                |

|                                                |                                                                                                                                                                                                                                                                                                                                                                                                              |
|------------------------------------------------|--------------------------------------------------------------------------------------------------------------------------------------------------------------------------------------------------------------------------------------------------------------------------------------------------------------------------------------------------------------------------------------------------------------|
| 8. Book with edition                           | 8. King Lester S. <i>Why Not Say It Clearly: A Guide to Scientific Writing</i> , 2nd ed.; Little, Brown: Boston, MA, 1991.                                                                                                                                                                                                                                                                                   |
| 9. Edited book                                 | 9. Warren B. K., Oyama S. T., Eds. <i>The Chemistry of the Atmosphere: Oxidants and Oxidation in the Earth's Atmosphere</i> ; Royal Society of Chemistry: Cambridge, England, 1995.                                                                                                                                                                                                                          |
| 10. Edited book with chapter title and editors | 10. Laidlaw I., Steinmetz M. Introduction to differential sedimentation. In <i>Analytical Ultracentrifugation: Techniques and Methods</i> ; Scott D. L., Harding S. E., Rowe A. J., Eds. Royal Society of Chemistry: Cambridge, 2005; pp. 270–290.                                                                                                                                                           |
| 11. Edited book series                         | 11. Wiberg K. Guidelines for drinking water quality. In <i>Investigations Rates and Mechanisms Reactions</i> ; Lewis E. S., Ed.; <i>Techniques of Chemistry</i> , Vol. VI, 1974; p. 764.                                                                                                                                                                                                                     |
| 12. Proceedings/Conferences                    | 12. Harwood J. S. Direct detection of volatile metabolites produced by microorganisms. In <i>Proceedings of the 36th ASMS Conference on Mass Spectrometry and Allied Topics</i> , San Francisco, CA, June 5–10, 1988.                                                                                                                                                                                        |
| 13. Electronic publication<br>(Available at)   | <b>Available at/Retrieved from – text not allowed</b><br>13. Fine L. Einstein Revisited. <i>J. Chem. Educ.</i> [Online] 2005, 82, 1601 ff. <a href="http://jchemed.chem.wisc.edu/Journal/Issues/2005/Nov/abs1601.html">http://jchemed.chem.wisc.edu/Journal/Issues/2005/Nov/abs1601.html</a> (accessed Oct 15, 2005).                                                                                        |
| 14. Electronic publication<br>(Accessed)       | 14. Zloh M., Esposito D., Gibbons W. A. Helical net plots and lipid favourable surface mapping of transmembrane helices of integral membrane proteins: aids to structure determination of integral membrane proteins. <i>Internet J. Chem.</i> 2003, 6, Article 2. <a href="http://www.ijc.com/articles/2003v6/2/(accessed Oct 13, 2004)">http://www.ijc.com/articles/2003v6/2/(accessed Oct 13, 2004)</a> . |
| 15. Thesis/Dissertation                        | 15. Cotruvo J. <i>Kinetic Model for Chlorophyll Degradation</i> . Ph.D. Thesis, Massachusetts Institute of Technology, Cambridge, MA, 1996.                                                                                                                                                                                                                                                                  |
| 16. Report                                     | 16. Tschantz B. A., Moran B. M. <i>Modeling of the Hydrologic Transport of Mercury in the Upper East Fork Poplar Creek (UEFPC) Watershed</i> ; Technical Report for Lockheed Martin Energy Systems: Bethesda, MD, 2004.                                                                                                                                                                                      |
| 17. Patent                                     | 17. Bernson S. W. Conversion of Methane. U.S. Patent 4,199,533, April 22, 1980.                                                                                                                                                                                                                                                                                                                              |
| 18. Standards                                  | 18. <i>The Sadtler Standard Spectra: 300 MHz Proton NMR Standards</i> ; Bio-Rad, Sadtler Division: Philadelphia, PA, 1994; No. 7640 (1-Chloropentane), 2005.                                                                                                                                                                                                                                                 |
| 19. Computer Programs                          | Author X., Author Y. PROGRAM TITLE (version or edition); Publisher/University/Company: Place of Publication, Year.                                                                                                                                                                                                                                                                                           |

If you have any questions or problems with the submission, please contact the publisher's editorial contact listed on the homepage.

Last Update: October 2023
